# Supplementary material
Source: MDPI journal article supplement (https://www.mdpi.com/2306-5338/3/4/42)
Supplement: s1 [file s1]

# Supplementary Materials: Integrated Flood Risk Assessment of Rural Communities in the Oti River Basin, West Africa

Kossi Komi, Barnabas A. Amisigo and Bernd Diekkrüger

**Table S1.** Questionnaire used in the Community-based Disaster Risk Index, modified from Bollin et al. [12].

| 1. Hazard  |                                                                             |        |  |  |
|------------|-----------------------------------------------------------------------------|--------|--|--|
|            | Experienced hazard                                                          |        |  |  |
| <b>1.1</b> | (H1) Occurrence                                                             |        |  |  |
|            | How often did an emergency with this hazard happen in the past 30 years     |        |  |  |
|            | 0–1 Times                                                                   | Low    |  |  |
|            | 2–3 Times                                                                   | Medium |  |  |
|            | > 3 Times                                                                   | High   |  |  |
| <b>1.2</b> | (H3) Intensity                                                              |        |  |  |
|            | What was the intensity of the worst event in the last 30 years?             |        |  |  |
|            | No persons killed, only damages to houses and infrastructure                | Low    |  |  |
|            | Few persons killed, destruction of some houses and infrastructure           | Medium |  |  |
|            | More than few persons killed, destruction of many houses and infrastructure | High   |  |  |

| 2. EXPOSURE |                                     |        |  |  |
|-------------|-------------------------------------|--------|--|--|
|             | STRUCTURES                          |        |  |  |
| <b>2.1</b>  | (E1) number of housing units.       |        |  |  |
|             | Total number of housing units       |        |  |  |
|             | < 10,000                            | Low    |  |  |
|             | 10.000–100.000                      | Medium |  |  |
|             | > 100.000                           | High   |  |  |
| <b>2.2</b>  | (E2) lifelines                      |        |  |  |
|             | % of homes with piped drinking      |        |  |  |
|             | < 20%                               | Low    |  |  |
|             | 20%–50%                             | Medium |  |  |
|             | > 50%                               | High   |  |  |
| <b>2.2</b>  | Economy                             |        |  |  |
|             | (E3) average income per capita/year |        |  |  |
|             | < \$1022                            | Low    |  |  |
|             | \$1022–\$4015                       | Medium |  |  |

|                                     |                                                  |        |  |  |
|-------------------------------------|--------------------------------------------------|--------|--|--|
|                                     | > \$4015/capita/year                             | High   |  |  |
|                                     | <b>Population</b>                                |        |  |  |
| <b>2.3 (E4) Resident population</b> |                                                  |        |  |  |
|                                     | Total number of population living in the commune |        |  |  |
|                                     | < 50,000                                         | Low    |  |  |
|                                     | 50,000–500,000                                   | Medium |  |  |
|                                     | > 500,000                                        | High   |  |  |

|                                 |                                                       |        |  |  |
|---------------------------------|-------------------------------------------------------|--------|--|--|
| <b>3. VULNERABILITY</b>         |                                                       |        |  |  |
| <b>3.1 Physical/demographic</b> |                                                       |        |  |  |
|                                 | <b>(V1) Density</b>                                   |        |  |  |
|                                 | How many people per km <sup>2</sup> live in the       |        |  |  |
|                                 | < 100                                                 | Low    |  |  |
|                                 | 100–500                                               | Medium |  |  |
|                                 | > 500                                                 | High   |  |  |
|                                 | <b>(v2) Demographic pressure</b>                      |        |  |  |
|                                 | Population growth rate                                |        |  |  |
|                                 | < 2%                                                  | Low    |  |  |
|                                 | 2–4%                                                  | Medium |  |  |
|                                 | > 4%                                                  | High   |  |  |
|                                 | <b>(V3) Flood-prone areas</b>                         |        |  |  |
|                                 | % of the total area prone to flood                    |        |  |  |
|                                 | < 10%                                                 | Low    |  |  |
|                                 | 10–30%                                                | Medium |  |  |
|                                 | > 30%                                                 | High   |  |  |
|                                 | <b>(V4) Access to basic services</b>                  |        |  |  |
|                                 | Rate of access to safe drinking water                 |        |  |  |
|                                 | > 50%                                                 | Low    |  |  |
|                                 | 20–50%                                                | Medium |  |  |
|                                 | < 20%                                                 | High   |  |  |
| <b>3.2 Social</b>               |                                                       |        |  |  |
|                                 | <b>(V5) Poverty level</b>                             |        |  |  |
|                                 | Percent of population below poverty level (\$1/DAY)   |        |  |  |
|                                 | < 10%                                                 | Low    |  |  |
|                                 | 10–30%                                                | Medium |  |  |
|                                 | > 30%                                                 | High   |  |  |
|                                 | <b>(V6) Literacy</b>                                  |        |  |  |
|                                 | Percentage of adult population able to read and write |        |  |  |
|                                 | > 70%                                                 | Low    |  |  |

|            |                                                                                                                  |               |  |  |
|------------|------------------------------------------------------------------------------------------------------------------|---------------|--|--|
|            | 40–70%                                                                                                           | Medium        |  |  |
|            | < 40                                                                                                             | High          |  |  |
|            | <b>(V7) Attitude</b>                                                                                             |               |  |  |
|            | What priority does the general population give the protection against a flood hazard                             |               |  |  |
|            | High priority. Protection against a hazard                                                                       | Low           |  |  |
|            | Concerned, but only if a disaster has hit.                                                                       | Medium        |  |  |
|            | Not concerned. Other issues (food, work)                                                                         | High          |  |  |
|            | <b>(V8) Decentralization</b>                                                                                     |               |  |  |
|            | What is the portion of self-generated revenues of the total available                                            |               |  |  |
|            | > 50%                                                                                                            | Low           |  |  |
|            | 20–50%                                                                                                           | Medium        |  |  |
|            | < 20%                                                                                                            | High          |  |  |
|            | <b>(V9) Community participation</b>                                                                              |               |  |  |
|            | % voter turnout on last commune                                                                                  |               |  |  |
|            | > 70%                                                                                                            | Low           |  |  |
|            | 50–70%                                                                                                           | Medium        |  |  |
|            | < 20%                                                                                                            | High          |  |  |
| <b>3.3</b> | <b>Economic</b>                                                                                                  |               |  |  |
|            | <b>(V10) Local resource base</b>                                                                                 |               |  |  |
|            | <b>Does the community have a budget</b>                                                                          | <b>Yes/no</b> |  |  |
|            | Enough to help the most affected                                                                                 | Low           |  |  |
|            | Insufficient                                                                                                     | High          |  |  |
|            | <b>(V11) Diversification</b>                                                                                     |               |  |  |
|            | Source of livelihood comes from one, two or three                                                                |               |  |  |
|            | Mix of 3 sectors                                                                                                 | Low           |  |  |
|            | Mix of 2 sectors                                                                                                 | Medium        |  |  |
|            | More than 80% in 1 sector                                                                                        | High          |  |  |
|            | <b>(V12) Small business</b>                                                                                      |               |  |  |
|            | Percentage of businesses with fewer than 20 employees                                                            |               |  |  |
|            | < 50%                                                                                                            | Low           |  |  |
|            | 50–80%                                                                                                           | Medium        |  |  |
|            | > 80%                                                                                                            | High          |  |  |
|            | <b>(V13) Accessibility</b>                                                                                       |               |  |  |
|            | How often in the last 5 years was the commune isolated through interruption of access roads for more than 2 days |               |  |  |
|            | 0- time                                                                                                          | Low           |  |  |
|            | 1–5 times                                                                                                        | Medium        |  |  |
|            | > 5 times                                                                                                        | High          |  |  |
| <b>3.4</b> | <b>Environmental</b>                                                                                             |               |  |  |

|  |                                                                        |        |  |  |
|--|------------------------------------------------------------------------|--------|--|--|
|  | <b>(V14) Area under forest</b>                                         |        |  |  |
|  | How much of the total territory of the commune is covered with forest? |        |  |  |
|  | > 30%                                                                  | Low    |  |  |
|  | 10–30%                                                                 | Medium |  |  |
|  | < 10%                                                                  | High   |  |  |
|  |                                                                        |        |  |  |

#### 4. CAPACITIES AND MANAGEMENT

|                              |                                                                                                                                                                                                       |                                             |                                  |             |
|------------------------------|-------------------------------------------------------------------------------------------------------------------------------------------------------------------------------------------------------|---------------------------------------------|----------------------------------|-------------|
| 1. CAPACITIES AND MANAGEMENT |                                                                                                                                                                                                       |                                             |                                  |             |
| 4.1                          | Physical planning and engineering                                                                                                                                                                     |                                             |                                  |             |
|                              | (C1) Landuse planning                                                                                                                                                                                 |                                             | Their enforcement is             | Evaluation  |
|                              | Does a land use plan or zoning regulations exists that keeps local production and housing out of hazardous areas?                                                                                     | YES/NO<br>If YES, explain                   | Low                              | Low         |
|                              |                                                                                                                                                                                                       |                                             | High                             | High        |
|                              | (C2) Preventive measures                                                                                                                                                                              |                                             | Expected effect on damage        |             |
|                              | Do flood exposure-limiting mechanisms/structures exist (dykes, retaining walls, dams, barrages, rock fall barriers, terraces, drainage)?                                                              | YES/NO<br>If YES, explain                   | Low                              | Low         |
|                              |                                                                                                                                                                                                       |                                             | Medium/high                      | Medium/high |
|                              | (C3) Environmental management                                                                                                                                                                         |                                             | Number of activities and project |             |
|                              | Are there activities to promote and enforce conservation of natural resources in risk areas (e.g. protection of water reserves, natural resources, desertification control techniques, reforestation) | YES/NO<br>If YES, explain                   | Few                              | Low         |
|                              |                                                                                                                                                                                                       |                                             | Some                             | Medium      |
|                              |                                                                                                                                                                                                       |                                             | Many                             | High        |
| 4.2                          | Societal measures                                                                                                                                                                                     |                                             |                                  |             |
|                              | (C4) Public awareness                                                                                                                                                                                 |                                             | Frequency                        |             |
|                              | Are the public awareness programs executed?                                                                                                                                                           | YES/NO<br>If YES, what are these programmes | Once                             | Low         |
|                              |                                                                                                                                                                                                       |                                             | sometimes                        | Medium      |
|                              |                                                                                                                                                                                                       |                                             | regular                          | High        |
|                              | (C5) School curriculum                                                                                                                                                                                |                                             | The topics are taught at         |             |
|                              | Are risk, disaster, environment and development topics part of taught lessons at school?                                                                                                              | YES/NO<br>If YES, explain                   | One grade only                   | Low         |
|                              | (C6) Public participation                                                                                                                                                                             |                                             | It is composed of                |             |
|                              | Is the public represented as member in the risk management/ emergency committee?                                                                                                                      | YES/NO<br>If YES, explain                   | Only level 1                     | Low         |
|                              |                                                                                                                                                                                                       |                                             | Level 2                          | Medium      |
|                              |                                                                                                                                                                                                       |                                             | Level 3 of the society           | High        |
|                              | Level 1: administration (mayor's office, planning department                                                                                                                                          |                                             |                                  |             |
|                              | Level 2: relevant response institutions (police, fire brigade, education, emergence health)                                                                                                           |                                             |                                  |             |

|     |                                                                                                                                   |                           |                                           |        |
|-----|-----------------------------------------------------------------------------------------------------------------------------------|---------------------------|-------------------------------------------|--------|
|     | Level 3: the public (business, civil society, NGO'S)                                                                              |                           |                                           |        |
|     | (C7) Access to national emergency fund                                                                                            |                           | How fast can it be released/ received     |        |
|     | Is there access to a national/ district emergency fund?                                                                           | YES/NO<br>If YES, explain | > 7days                                   | Low    |
|     |                                                                                                                                   |                           | 3–5 days                                  | Medium |
|     |                                                                                                                                   |                           | < 3 days                                  | High   |
|     | (C8) Access to international emergency funds                                                                                      |                           | Access to funds is:                       |        |
|     | Is there access to international emergency funds?                                                                                 | YES/NO<br>If YES, explain | Difficult                                 | Low    |
|     |                                                                                                                                   |                           | Easy                                      | High   |
|     | (C9) Insurance market                                                                                                             |                           | Use                                       |        |
|     | Is disaster risk insurance coverage for buildings available?                                                                      | YES/NO<br>If YES, explain | Not common                                | Low    |
|     |                                                                                                                                   |                           | Common                                    | High   |
| 4.3 | Management and institutional measure                                                                                              |                           |                                           |        |
|     |                                                                                                                                   |                           |                                           |        |
|     | (C10) Risk management                                                                                                             |                           | Meeting frequency:                        |        |
|     | Does a community risk management or emergency committee exist, that deals with prevention, mitigation, Preparedness and response? | YES/NO<br>If YES, explain | Only during Emergency                     | Low    |
|     |                                                                                                                                   |                           | Once a year                               | Medium |
|     |                                                                                                                                   |                           | At least quarterly                        | High   |
|     | (C11) Risk map                                                                                                                    |                           | The map is available at                   |        |
|     | Does a risk map exist?                                                                                                            | YES/NO<br>If YES, explain | Only level1                               | Low    |
|     |                                                                                                                                   |                           | Also at level 2                           | Medium |
|     |                                                                                                                                   |                           | Also at level 3                           | High   |
|     | Level 1: administration (mayor’s office, planning department)                                                                     |                           |                                           |        |
|     | Level 2: relevant response institutions (police, fire brigade, education, emergence health)                                       |                           |                                           |        |
|     | Level 3: the public (business, civil society, NGO'S)                                                                              |                           |                                           |        |
|     | (C12) Emergency plan                                                                                                              |                           | Availability of maps at different levels: |        |
|     | Is there a worked out and circulated emergency plan?                                                                              | YES/NO<br>If YES, explain | One                                       | Low    |
|     |                                                                                                                                   |                           | Few                                       | Medium |
|     |                                                                                                                                   |                           | many                                      | High   |
|     | (C13) Early warning system                                                                                                        |                           | Does it work                              |        |
|     | Is an early warning system in place?                                                                                              | YES/NO<br>If YES, explain | Low                                       | Low    |
|     |                                                                                                                                   |                           | Medium                                    | Medium |
|     |                                                                                                                                   |                           | High                                      | High   |
|     | (C14) Institutional capacity building                                                                                             |                           |                                           |        |

|  |                                                                                                                               |                                         |           |        |
|--|-------------------------------------------------------------------------------------------------------------------------------|-----------------------------------------|-----------|--------|
|  | Do local institutions (administration, police, fire brigade, hospitals, building sector) receive training on risk management? | <b>YES/NO</b><br><b>If YES, explain</b> | Sometimes | Low    |
|  |                                                                                                                               |                                         | Often     | Medium |
|  |                                                                                                                               |                                         | Constant  | High   |
|  | <b>(C15) Communication</b>                                                                                                    |                                         |           |        |
|  | Is there coordination with national level risk management organizations (national committees, government etc.)?               | <b>YES/NO</b><br><b>If YES, explain</b> | Sometimes | Low    |
|  |                                                                                                                               |                                         | Often     | Medium |
|  |                                                                                                                               |                                         | constant  | High   |
